# Supplementary material for: Bioinspired, direct synthesis of aqueous CdSe quantum dots for high-sensitive copper(ii) ion detection
Source: Royal Society of Chemistry journal article supplement (doi:10.1039/c3dt51399h), 2013-01-01
Supplement: c3dt51399h.pdf [file c3dt51399h.pdf]

**Bioinspired, direct synthesis of aqueous CdSe quantum dots for  
high-sensitive copper (II) ion detection**

Xiaohai Bu, Yuming Zhou<sup>\*</sup>, Man He, Zhenjie Chen and Tao Zhang

School of Chemistry and Chemical Engineering, Southeast University,  
Jiangsu Optoelectronic Functional Materials and Engineering Laboratory,  
Nanjing 211189, China

---

<sup>\*</sup> Corresponding author: Tel. /fax: +86 25 52090617.  
E-mail address: ymzhou@seu.edu.cn (Y. Zhou).

**Fig. S1.** TGA curves for (a) native BSA molecular and (b) dBSA coated CdSe QDs

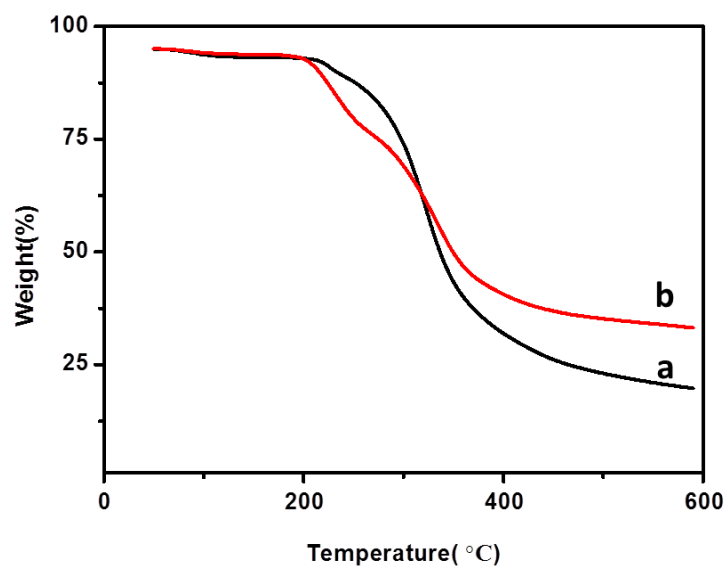

**Fig. S2.** Normalized PL intensity of dBSA coated CdSe QDs for evolution under ultraviolet irradiation measured at 525 nm

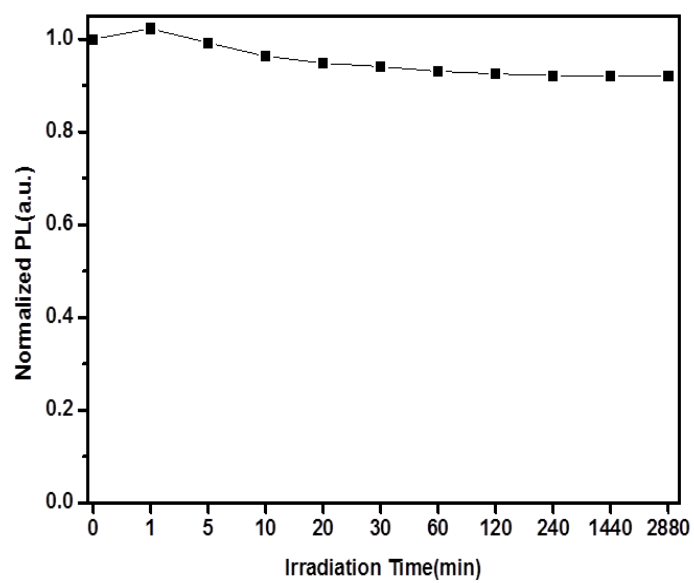

**Fig. S3.** TEM images of CdSe QDs flower shape aggregates in the presence of  $\text{Cu}^{2+}$

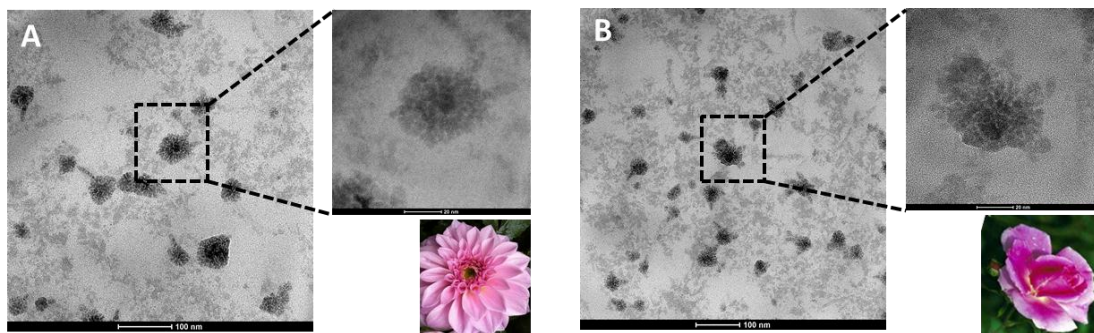

**Fig. S4.** XRD for native BSA (a), dBSA coated CdSe QDs (b) and CdSe QDs in the presence of  $\text{Cu}^{2+}$  (c). In b, three diffraction peaks ( $2\theta$ ) at  $25.45^\circ$ ,  $42.08^\circ$ ,  $49.82^\circ$  respectively correspond to the (111), (220), (311) crystal planes of CdSe QDs.

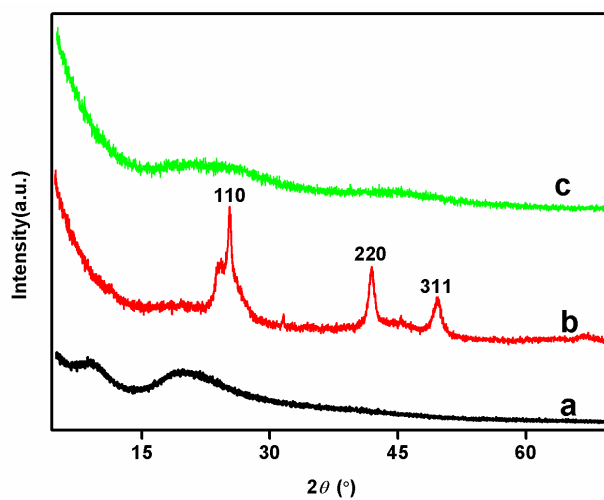

**Fig. S5.** UV-vis spectra for dBSA coated CdSe QDs in the absence and presence of  $\text{Cu}^{2+}$  (25, 250, 1000, 2000, 4000 nM). The UV-vis absorption of  $\text{Cu}^{2+}$  above 4000 nM are not presented here because the curves of them have no obvious absorption peak which is similar to the curve of QDs- $\text{Cu}^{2+}$  (4000 nM).

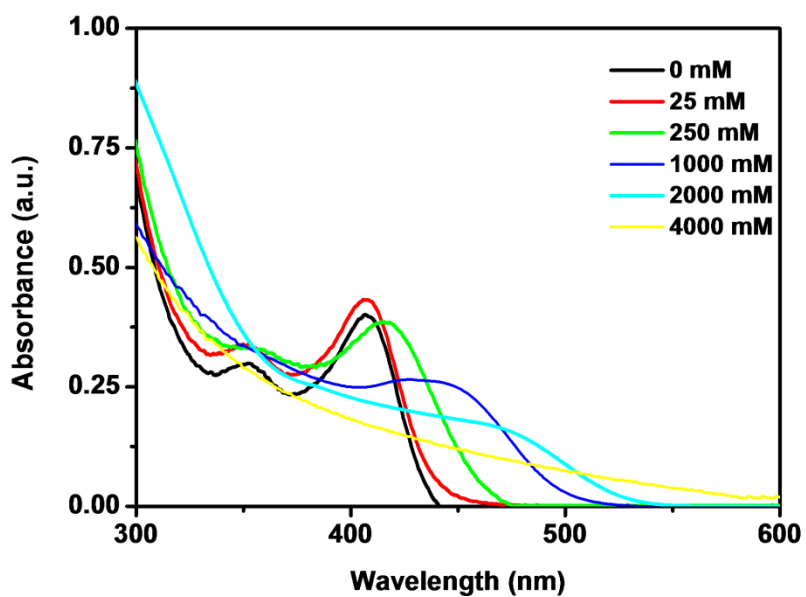

**Fig. S6.** CD spectrum of dBSA coated CdSe QDs in the presence of  $\text{Cu}^{2+}$  (10 mM).

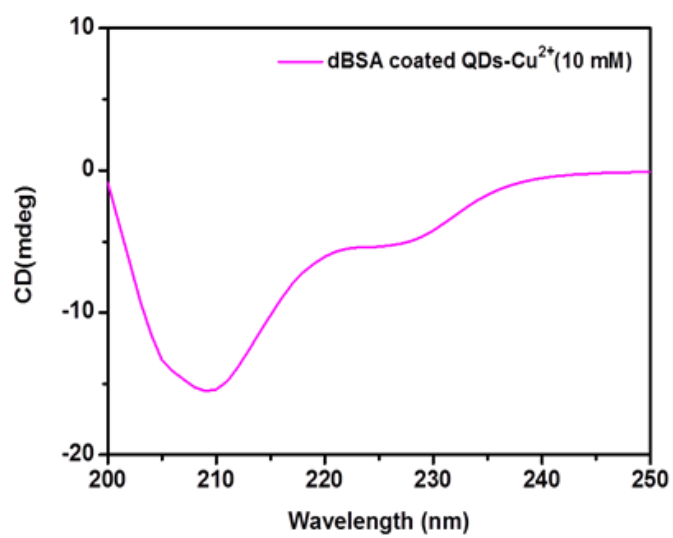

**Table S1.** Comparison of probes for copper (II) detection based on CdSe QDs

| QDs Probes | Capping ligands  | Detection concentration range      | Detection limit          | Reference      |
|------------|------------------|------------------------------------|--------------------------|----------------|
| CdTe/CdSe  | MPA              | $0.05\sim 5.0 \times 10^{-5}$ M    | $2.0 \times 10^{-8}$ M   | [1]            |
| CdSe       | -SO <sub>3</sub> | 0~60 $\mu\text{gL}^{-1}$           | 2.4 $\mu\text{gL}^{-1}$  | [2]            |
|            | -COO             | 0~60 $\mu\text{gL}^{-1}$           | 9.7 $\mu\text{gL}^{-1}$  |                |
| CdSe/Ag    | 16-MHA           | 5~100 $\mu\text{M}$                | 5 nM                     | [3]            |
| CdSe/ZnS   | BSA              | 0.1~1.6 $\mu\text{M}$              | 10 nM                    | [4]            |
| CdSe/CdS   | DDTC             | 0~100 $\mu\text{gL}^{-1}$          | 0.29 $\mu\text{gL}^{-1}$ | [5]            |
| CdSe/CdS   | L-cysteine       | $10^{-8}\sim 2.0 \times 10^{-7}$ M | 3 nM                     | [6]            |
| CdSe/ZnS   | silica           | 0~10 $\mu\text{M}$                 | 0.9 $\mu\text{M}$        | [7]            |
| CdSeTe     | L-cysteine       | 0.02~2.0 $\mu\text{M}$             | 7 nM                     | [8]            |
| CdSe       | dBSA             | $10^{-8}\sim 7.5 \times 10^{-6}$ M | 5 nM                     | Currently used |

#### Reference

- (1) Xia, Y., Zhu, C. *Analyst* 2008, 133, 928.
- (2) Fernández-Argüelles, M. T., Jin, W. J., Costa-Fernández, J. M., Pereiro, R., Sanz-Medel, A. *Anal. Chim. Acta* 2005, 549, 20.
- (3) Chan, Y. H., Chen, J., Liu, Q., Wark, S. E., Son, D. H., Batteas, J. D. *Anal. Chem.* 2010, 82, 3671.
- (4) Xie, H. Y., Liang, J. G., Zhang, Z. L., Liu, Y., He, Z. K., Pang, D. W. *Spectrochim Acta Part A* 2004, 60, 2527.
- (5) Wang, J., Zhou, X., Ma, H., Tao, G. *Spectrochim. Acta Part A* 2011, 81, 178.
- (6) Zhang, Y. H., Zhang, H. S., Guo, X. F., Wang, H. *Microchem. J.* 2008, 89, 142.
- (7) Sung, T. W., Lo, Y. L. *Sens. Actuators B* 2012, 165, 119.
- (8) Liang, G. X., Liu, H. Y., Zhang, J. R., Zhu, J. J. *Talanta* 2010, 80, 2172.
